# Supplementary material for: No Observed Adverse Effects on Health Were Detected in Adult Beagle Dogs When Fed a High-Calcium Diet for 40 Weeks
Source: MDPI journal article supplement (doi:10.3390/ani11061799), 2021-06-16
Supplement: s1 [file s1]

**Table S2. Additional plasma biochemistry**

Additional plasma biochemistry values given as means and 95% confidence intervals (CI) for control (*n* 8) and test (*n* 10) diet dog groups at baseline and at 8 week intervals. P values represent comparison between diet groups at the sample collection time point ( $p < 0.05$  is statistically significant).

|                                  | Weeks    | Control    |        |                | Test        |         |                | <i>P</i> |
|----------------------------------|----------|------------|--------|----------------|-------------|---------|----------------|----------|
|                                  |          |            | Mean   | 95% CI         |             | Mean    | 95% CI         |          |
| Albumin (g/L)                    | Baseline | <i>n</i> 8 | 32.38  | 31.13, 33.68   | <i>n</i> 10 | 30.33   | 29.28, 31.42   | 0.013    |
|                                  | 8        | <i>n</i> 8 | 32.87  | 31.60, 34.18   | <i>n</i> 10 | 30.80   | 29.74, 31.90   | 0.013    |
|                                  | 16       | <i>n</i> 8 | 32.23  | 30.99, 33.53   | <i>n</i> 10 | 30.73   | 29.67, 31.83   | 0.171    |
|                                  | 24       | <i>n</i> 8 | 32.63  | 31.38, 33.94   | <i>n</i> 10 | 30.80   | 29.74, 31.90   | 0.044    |
|                                  | 32       | <i>n</i> 8 | 33.22  | 31.94, 34.56   | <i>n</i> 10 | 31.39*  | 30.30, 32.51   | 0.051    |
|                                  | 40       | <i>n</i> 8 | 32.94  | 31.67, 34.27   | <i>n</i> 10 | 30.42   | 29.37, 31.51   | <0.001   |
| Total protein (g/L)              | Baseline | <i>n</i> 8 | 59.19  | 57.24, 61.21   | <i>n</i> 10 | 54.64   | 53.03, 56.31   | <0.001   |
|                                  | 8        | <i>n</i> 8 | 58.48  | 56.55, 60.47   | <i>n</i> 10 | 55.64   | 53.99, 57.33   | 0.038    |
|                                  | 16       | <i>n</i> 8 | 58.69  | 56.75, 60.69   | <i>n</i> 10 | 55.74   | 54.09, 57.44   | 0.027    |
|                                  | 24       | <i>n</i> 8 | 59.05  | 57.10, 61.06   | <i>n</i> 10 | 56.03   | 54.37, 57.74   | 0.022    |
|                                  | 32       | <i>n</i> 8 | 59.40  | 57.44, 61.43   | <i>n</i> 10 | 57.79*  | 56.09, 59.56   | 0.671**  |
|                                  | 40       | <i>n</i> 8 | 60.31  | 58.32, 62.37   | <i>n</i> 10 | 57.40*  | 55.71, 59.15   | 0.041    |
| Alanine aminotransferase (U/L)   | Baseline | <i>n</i> 8 | 33.06  | 20.84, 52.44   | <i>n</i> 10 | 31.31   | 20.72, 47.30   | 1.000    |
|                                  | 8        | <i>n</i> 8 | 31.23  | 19.69, 49.53   | <i>n</i> 10 | 28.81   | 19.07, 43.52   | 1.000    |
|                                  | 16       | <i>n</i> 8 | 34.13  | 21.52, 54.14   | <i>n</i> 10 | 28.46   | 18.84, 43.00   | 0.998    |
|                                  | 24       | <i>n</i> 8 | 36.15  | 22.79, 57.34   | <i>n</i> 10 | 27.76   | 18.38, 41.95   | 0.960    |
|                                  | 32       | <i>n</i> 8 | 29.38  | 18.52, 46.60   | <i>n</i> 10 | 27.90   | 18.47, 42.16   | 1.000    |
|                                  | 40       | <i>n</i> 8 | 32.88  | 20.73, 52.15   | <i>n</i> 10 | 28.24   | 18.69, 42.66   | 1.000    |
| Alkaline phosphatase (U/L)       | Baseline | <i>n</i> 8 | 60.08  | 42.85, 84.24   | <i>n</i> 10 | 71.50   | 52.85, 96.74   | 0.977    |
|                                  | 8        | <i>n</i> 8 | 54.32  | 38.75, 76.17   | <i>n</i> 10 | 72.48   | 53.58, 98.07   | 0.654    |
|                                  | 16       | <i>n</i> 8 | 48.82* | 34.82, 68.45   | <i>n</i> 10 | 66.98   | 49.51, 90.62   | 0.533    |
|                                  | 24       | <i>n</i> 8 | 45.96* | 32.78, 64.45   | <i>n</i> 10 | 62.27   | 46.02, 84.24   | 0.588    |
|                                  | 32       | <i>n</i> 8 | 45.00* | 32.10, 63.10   | <i>n</i> 10 | 63.17   | 46.69, 85.47   | 0.437    |
|                                  | 40       | <i>n</i> 8 | 44.23* | 31.55, 62.01   | <i>n</i> 10 | 59.73   | 44.15, 80.81   | 0.602    |
| Aspartate aminotransferase (U/L) | Baseline | <i>n</i> 8 | 26.87  | 21.91, 32.95   | <i>n</i> 10 | 26.59   | 22.15, 31.91   | 1.000    |
|                                  | 8        | <i>n</i> 8 | 28.64  | 23.36, 35.12   | <i>n</i> 10 | 26.38   | 21.98, 31.66   | 0.995    |
|                                  | 16       | <i>n</i> 8 | 26.39  | 21.52, 32.36   | <i>n</i> 10 | 28.26   | 23.55, 33.92   | 0.999    |
|                                  | 24       | <i>n</i> 8 | 27.49  | 22.41, 33.71   | <i>n</i> 10 | 26.22   | 21.85, 31.47   | 1.000    |
|                                  | 32       | <i>n</i> 8 | 25.70  | 20.96, 31.52   | <i>n</i> 10 | 25.54   | 21.28, 30.65   | 1.000    |
|                                  | 40       | <i>n</i> 8 | 26.41  | 21.54, 32.39   | <i>n</i> 10 | 25.77   | 21.47, 30.92   | 1.000    |
| Cholesterol (mmol/L)             | Baseline | <i>n</i> 8 | 5.05   | 4.45, 5.73     | <i>n</i> 10 | 4.67    | 4.17, 5.23     | 0.926    |
|                                  | 8        | <i>n</i> 8 | 5.19   | 4.57, 5.89     | <i>n</i> 10 | 5.04*   | 4.50, 5.64     | 1.000    |
|                                  | 16       | <i>n</i> 8 | 5.09   | 4.49, 5.78     | <i>n</i> 10 | 5.02*   | 4.48, 5.62     | 1.000    |
|                                  | 24       | <i>n</i> 8 | 4.91   | 4.33, 5.57     | <i>n</i> 10 | 4.98    | 4.45, 5.58     | 1.000    |
|                                  | 32       | <i>n</i> 8 | 4.92   | 4.33, 5.58     | <i>n</i> 10 | 4.90    | 4.38, 5.49     | 1.000    |
|                                  | 40       | <i>n</i> 8 | 4.96   | 4.37, 5.63     | <i>n</i> 10 | 5.09*   | 4.54, 5.70     | 1.000**  |
| Triglycerides (mmol/L)           | Baseline | <i>n</i> 8 | 0.45   | 0.32, 0.63     | <i>n</i> 10 | 0.43    | 0.32, 0.58     | 1.000    |
|                                  | 8        | <i>n</i> 8 | 0.50   | 0.36, 0.70     | <i>n</i> 10 | 0.41    | 0.31, 0.55     | 0.927    |
|                                  | 16       | <i>n</i> 8 | 0.57   | 0.41, 0.80     | <i>n</i> 10 | 0.50    | 0.37, 0.67     | 0.996    |
|                                  | 24       | <i>n</i> 8 | 0.58   | 0.42, 0.81     | <i>n</i> 10 | 0.47    | 0.35, 0.64     | 0.908    |
|                                  | 32       | <i>n</i> 8 | 0.60   | 0.43, 0.84     | <i>n</i> 10 | 0.55    | 0.41, 0.74     | 1.000    |
|                                  | 40       | <i>n</i> 8 | 0.57   | 0.41, 0.80     | <i>n</i> 10 | 0.53    | 0.39, 0.71     | 1.000    |
| Sodium (mmol/L)                  | Baseline | <i>n</i> 8 | 145.12 | 142.44, 147.85 | <i>n</i> 10 | 145.07  | 142.67, 147.51 | 1.000    |
|                                  | 8        | <i>n</i> 8 | 146.24 | 143.54, 148.98 | <i>n</i> 10 | 145.77  | 143.36, 148.22 | 1.000    |
|                                  | 16       | <i>n</i> 8 | 144.20 | 141.54, 146.91 | <i>n</i> 10 | 144.45  | 142.07, 146.88 | 1.000    |
|                                  | 24       | <i>n</i> 8 | 144.63 | 141.97, 147.35 | <i>n</i> 10 | 137.35* | 135.08, 139.66 | <0.001** |
|                                  | 32       | <i>n</i> 8 | 143.98 | 141.33, 146.69 | <i>n</i> 10 | 145.15  | 142.76, 147.59 | 0.991    |
|                                  | 40       | <i>n</i> 8 | 145.45 | 142.77, 148.19 | <i>n</i> 10 | 145.82  | 143.42, 148.27 | 1.000    |
| Potassium (mmol/L)               | Baseline | <i>n</i> 8 | 4.19   | 3.94, 4.45     | <i>n</i> 10 | 4.16    | 3.94, 4.39     | 1.000    |

|                   |          |            |        |                |             |         |                |          |
|-------------------|----------|------------|--------|----------------|-------------|---------|----------------|----------|
|                   | 8        | <i>n</i> 8 | 4.14   | 3.90, 4.40     | <i>n</i> 10 | 4.12    | 3.90, 4.35     | 1.000    |
|                   | 16       | <i>n</i> 8 | 4.23   | 3.98, 4.49     | <i>n</i> 10 | 4.18    | 3.96, 4.41     | 1.000    |
|                   | 24       | <i>n</i> 8 | 4.12   | 3.87, 4.37     | <i>n</i> 10 | 3.87*   | 3.66, 4.08     | 0.356    |
|                   | 32       | <i>n</i> 8 | 4.14   | 3.90, 4.40     | <i>n</i> 10 | 4.08    | 3.87, 4.31     | 1.000    |
|                   | 40       | <i>n</i> 8 | 4.15   | 3.91, 4.41     | <i>n</i> 10 | 4.09    | 3.88, 4.32     | 1.000    |
| Chloride (mmol/L) | Baseline | <i>n</i> 8 | 111.87 | 109.61, 114.18 | <i>n</i> 10 | 111.66  | 109.64, 113.71 | 1.000    |
|                   | 8        | <i>n</i> 8 | 112.49 | 110.22, 114.81 | <i>n</i> 10 | 113.88  | 111.82, 115.98 | 0.917    |
|                   | 16       | <i>n</i> 8 | 111.61 | 109.35, 113.91 | <i>n</i> 10 | 112.33  | 110.30, 114.40 | 0.999    |
|                   | 24       | <i>n</i> 8 | 111.37 | 109.12, 113.67 | <i>n</i> 10 | 106.32* | 104.40, 108.28 | <0.001** |
|                   | 32       | <i>n</i> 8 | 111.45 | 109.19, 113.75 | <i>n</i> 10 | 113.53  | 111.48, 115.63 | 0.496    |
|                   | 40       | <i>n</i> 8 | 112.68 | 110.40, 115.01 | <i>n</i> 10 | 113.57  | 111.52, 115.67 | 0.996    |
| Glucose (mmol/L)  | Baseline | <i>n</i> 8 | 5.76   | 5.37, 6.17     | <i>n</i> 10 | 5.67    | 5.33, 6.03     | 1.000    |
|                   | 8        | <i>n</i> 8 | 5.66   | 5.28, 6.06     | <i>n</i> 10 | 5.57    | 5.24, 5.93     | 1.000    |
|                   | 16       | <i>n</i> 8 | 5.73   | 5.35, 6.14     | <i>n</i> 10 | 5.48    | 5.15, 5.83     | 0.895    |
|                   | 24       | <i>n</i> 8 | 5.77   | 5.38, 6.18     | <i>n</i> 10 | 5.67    | 5.33, 6.03     | 1.000    |
|                   | 32       | <i>n</i> 8 | 5.72   | 5.34, 6.13     | <i>n</i> 10 | 5.52    | 5.19, 5.88     | 0.978    |
|                   | 40       | <i>n</i> 8 | 5.66   | 5.29, 6.07     | <i>n</i> 10 | 5.48    | 5.15, 5.83     | 0.981    |

\* A significant difference from baseline within diet group ( $p < 0.05$ )

\*\* A significant difference from baseline between diet groups ( $p < 0.05$ )
