# Supplementary material for: No Observed Adverse Effects on Health Were Detected in Adult Beagle Dogs When Fed a High-Calcium Diet for 40 Weeks
Source: MDPI journal article supplement (doi:10.3390/ani11061799), 2021-06-16
Supplement: s1 [file s1]

**Table S4. Diet digestibility, mineral excretion and balance**

Additional biochemistry values given as means and 95% confidence intervals (CI) for control (*n* 8) and test (*n* 10) diet dog groups at baseline and at 8 week intervals. P values represent comparison between diet groups at the sample collection time point ( $p < 0.05$  is statistically significant).

|                                   | Weeks    | Control    |         |                | Test        |         |                | <i>P</i> |
|-----------------------------------|----------|------------|---------|----------------|-------------|---------|----------------|----------|
|                                   |          |            | Mean    | 95% CI         |             | Mean    | 95% CI         |          |
| Faecal calcium excretion (g/d)    | Baseline | <i>n</i> 8 | 1.17    | 0.86, 1.59     | <i>n</i> 10 | 1.21    | 0.92, 1.59     | 1.000    |
|                                   | 8        | <i>n</i> 8 | 2.20*   | 1.62, 2.99     | <i>n</i> 10 | 6.75*   | 5.13, 8.89     | <0.001** |
|                                   | 16       | <i>n</i> 6 | 1.37    | 0.99, 1.90     | <i>n</i> 10 | 6.62*   | 5.03, 8.71     | <0.001** |
|                                   | 24       | <i>n</i> 8 | 1.09    | 0.80, 1.48     | <i>n</i> 10 | 6.28*   | 4.77, 8.26     | <0.001** |
|                                   | 32       | <i>n</i> 8 | 0.94    | 0.69, 1.28     | <i>n</i> 10 | 6.22*   | 4.73, 8.19     | <0.001** |
|                                   | 40       | <i>n</i> 8 | 0.93    | 0.68, 1.26     | <i>n</i> 10 | 5.86*   | 4.46, 7.72     | <0.001** |
| Faecal phosphorus excretion (g/d) | Baseline | <i>n</i> 8 | 0.56    | 0.41, 0.75     | <i>n</i> 10 | 0.59    | 0.45, 0.77     | 1.000    |
|                                   | 8        | <i>n</i> 8 | 1.06*   | 0.78, 1.43     | <i>n</i> 10 | 3.44*   | 2.62, 4.51     | <0.001** |
|                                   | 16       | <i>n</i> 6 | 0.65    | 0.47, 0.90     | <i>n</i> 10 | 3.44*   | 2.62, 4.51     | <0.001** |
|                                   | 24       | <i>n</i> 8 | 0.52    | 0.38, 0.70     | <i>n</i> 10 | 3.26*   | 2.48, 4.28     | <0.001** |
|                                   | 32       | <i>n</i> 8 | 0.45    | 0.33, 0.61     | <i>n</i> 10 | 3.21*   | 2.45, 4.21     | <0.001** |
|                                   | 40       | <i>n</i> 8 | 0.43    | 0.31, 0.58     | <i>n</i> 10 | 2.97*   | 2.26, 3.90     | <0.001** |
| Urinary calcium excretion (g/d)   | Baseline | <i>n</i> 8 | 0.0019  | 0.0010, 0.0035 | <i>n</i> 10 | 0.0033  | 0.0019, 0.0056 | 0.541    |
|                                   | 8        | <i>n</i> 8 | 0.0056* | 0.0031, 0.0102 | <i>n</i> 10 | 0.0039  | 0.0023, 0.0067 | 0.921**  |
|                                   | 16       | <i>n</i> 8 | 0.0052* | 0.0028, 0.0094 | <i>n</i> 10 | 0.0078* | 0.0046, 0.0134 | 0.831    |
|                                   | 24       | <i>n</i> 8 | 0.0050* | 0.0027, 0.0090 | <i>n</i> 10 | 0.0068* | 0.0040, 0.0116 | 0.967    |
|                                   | 32       | <i>n</i> 8 | 0.0031  | 0.0017, 0.0056 | <i>n</i> 10 | 0.0075* | 0.0044, 0.0129 | 0.036    |
|                                   | 40       | <i>n</i> 8 | 0.0042* | 0.0023, 0.0077 | <i>n</i> 10 | 0.0072* | 0.0042, 0.0123 | 0.574    |
| Urinary phosphate excretion (g/d) | Baseline | <i>n</i> 8 | 0.1429  | 0.0855, 0.2389 | <i>n</i> 10 | 0.2641  | 0.1668, 0.4181 | 0.177    |
|                                   | 8        | <i>n</i> 8 | 0.3992* | 0.2388, 0.6670 | <i>n</i> 10 | 0.2538  | 0.1603, 0.4018 | 0.570**  |
|                                   | 16       | <i>n</i> 8 | 0.3081* | 0.1843, 0.5148 | <i>n</i> 10 | 0.6066* | 0.3832, 0.9602 | 0.094    |
|                                   | 24       | <i>n</i> 8 | 0.3858* | 0.2309, 0.6447 | <i>n</i> 10 | 0.5994* | 0.3786, 0.9488 | 0.606    |
|                                   | 32       | <i>n</i> 8 | 0.2383* | 0.1426, 0.3982 | <i>n</i> 10 | 0.5649* | 0.3569, 0.8942 | 0.010    |
|                                   | 40       | <i>n</i> 8 | 0.3788* | 0.2267, 0.6330 | <i>n</i> 10 | 0.7344* | 0.4639, 1.1625 | 0.111    |
| Calcium digestibility (%)         | Baseline | <i>n</i> 8 | 19.75   | -13.16, 52.66  | <i>n</i> 10 | 23.94   | -5.50, 53.37   | 1.000    |
|                                   | 8        | <i>n</i> 8 | -56.11* | -89.03, -23.20 | <i>n</i> 10 | 24.81   | -4.63, 54.24   | <0.001** |
|                                   | 16       | <i>n</i> 6 | 5.45    | -41.10, 51.99  | <i>n</i> 10 | 5.15    | -24.29, 34.58  | 1.000    |
|                                   | 24       | <i>n</i> 8 | 7.47    | -25.44, 40.38  | <i>n</i> 10 | 28.65   | -0.79, 58.08   | 0.875    |
|                                   | 32       | <i>n</i> 8 | 22.44   | -10.48, 55.35  | <i>n</i> 10 | -6.47   | -35.91, 22.97  | 0.538    |
|                                   | 40       | <i>n</i> 8 | 10.83   | -22.09, 43.74  | <i>n</i> 10 | 13.95   | -15.49, 43.39  | 1.000    |
| Phosphorus digestibility (%)      | Baseline | <i>n</i> 8 | 31.66   | 14.69, 48.64   | <i>n</i> 10 | 24.29   | 9.11, 39.48    | 0.991    |
|                                   | 8        | <i>n</i> 8 | -45.65* | -62.63, -28.68 | <i>n</i> 10 | 19.52   | 4.33, 34.70    | <0.001** |
|                                   | 16       | <i>n</i> 6 | 1.94*   | -17.66, 21.53  | <i>n</i> 10 | 5.36    | -9.83, 20.54   | 1.000    |
|                                   | 24       | <i>n</i> 8 | -1.98*  | -18.95, 15.00  | <i>n</i> 10 | 6.83    | -8.35, 22.02   | 0.966    |
|                                   | 32       | <i>n</i> 8 | 14.62   | -2.36, 31.59   | <i>n</i> 10 | 0.88*   | -14.30, 16.07  | 0.652    |
|                                   | 40       | <i>n</i> 8 | -7.14*  | -24.12, 9.83   | <i>n</i> 10 | 0.68*   | -14.51, 15.86  | 0.985    |
| Calcium balance (g/d)             | Baseline | <i>n</i> 8 | 0.27    | -0.51, 1.05    | <i>n</i> 10 | 0.37    | -0.32, 1.07    | 1.000    |
|                                   | 8        | <i>n</i> 8 | -0.81†  | -1.59, -0.04   | <i>n</i> 10 | 1.11†   | 0.41, 1.80     | <0.001** |
|                                   | 16       | <i>n</i> 6 | 0.02    | -0.88, 0.91    | <i>n</i> 10 | 0.89†   | 0.20, 1.59     | 0.308    |
|                                   | 24       | <i>n</i> 8 | 0.11    | -0.66, 0.89    | <i>n</i> 10 | 0.99†   | 0.29, 1.68     | 0.207    |
|                                   | 32       | <i>n</i> 8 | 0.23    | -0.55, 1.00    | <i>n</i> 10 | 0.24    | -0.45, 0.93    | 1.000    |
|                                   | 40       | <i>n</i> 8 | 0.11    | -0.66, 0.89    | <i>n</i> 10 | 0.48    | -0.21, 1.18    | 0.982    |
| Phosphate balance (g/d)           | Baseline | <i>n</i> 8 | 0.33    | -0.14, 0.80    | <i>n</i> 10 | 0.28    | -0.14, 0.70    | 1.000    |
|                                   | 8        | <i>n</i> 8 | -0.50*† | -0.97, -0.03   | <i>n</i> 10 | 0.96*†  | 0.54, 1.38     | <0.001** |
|                                   | 16       | <i>n</i> 6 | 0.01    | -0.53, 0.55    | <i>n</i> 10 | 0.36    | -0.06, 0.78    | 0.820    |
|                                   | 24       | <i>n</i> 8 | -0.02   | -0.49, 0.45    | <i>n</i> 10 | 0.40    | -0.02, 0.82    | 0.526    |
|                                   | 32       | <i>n</i> 8 | 0.13    | -0.34, 0.60    | <i>n</i> 10 | 0.03    | -0.39, 0.45    | 1.000    |
|                                   | 40       | <i>n</i> 8 | -0.06   | -0.53, 0.41    | <i>n</i> 10 | 0.03    | -0.38, 0.45    | 1.000    |

\* A significant difference from baseline within diet group ( $p < 0.05$ )

\*\* A significant difference from baseline between diet groups ( $p < 0.05$ )

† A significant difference from zero ( $p < 0.05$ )
