# Supplementary material for: No Observed Adverse Effects on Health Were Detected in Adult Beagle Dogs When Fed a High-Calcium Diet for 40 Weeks
Source: MDPI journal article supplement (doi:10.3390/ani11061799), 2021-06-16
Supplement: s1 [file s1]

**Table S3. Haematology**

Additional haematology values given as means and 95% confidence intervals (CI) for control ( $n = 8$ ) and test ( $n = 10$ ) diet dog groups at baseline and at 8 week intervals. P values represent comparison between diet groups at the sample collection time point ( $p < 0.05$  is statistically significant).

|                                                            | Weeks    | Control |       |              | Test     |        |              | P       |
|------------------------------------------------------------|----------|---------|-------|--------------|----------|--------|--------------|---------|
|                                                            |          |         | Mean  | 95% CI       |          | Mean   | 95% CI       |         |
| Red blood cells<br>( $10^{12}/L$ )                         | Baseline | $n = 8$ | 6.12  | 5.72, 6.52   | $n = 10$ | 5.70   | 5.34, 6.06   | 0.303   |
|                                                            | 8        | $n = 8$ | 6.10  | 5.70, 6.50   | $n = 10$ | 6.25*  | 5.89, 6.61   | 0.997   |
|                                                            | 16       | $n = 8$ | 6.21  | 5.81, 6.60   | $n = 10$ | 6.06   | 5.70, 6.41   | 0.997   |
|                                                            | 24       | $n = 8$ | 6.10  | 5.70, 6.50   | $n = 10$ | 6.28*  | 5.92, 6.64   | 0.991   |
|                                                            | 32       | $n = 2$ | 6.07  | 5.38, 6.76   | $n = 10$ | 6.01   | 5.65, 6.37   | 1.000   |
|                                                            | 40       | $n = 8$ | 6.36  | 5.96, 6.76   | $n = 10$ | 6.16*  | 5.80, 6.52   | 0.979   |
| Haemoglobin<br>(g/dL)                                      | Baseline | $n = 8$ | 16.61 | 15.41, 17.91 | $n = 10$ | 15.66  | 14.64, 16.75 | 0.708   |
|                                                            | 8        | $n = 8$ | 16.84 | 15.62, 18.15 | $n = 10$ | 16.99* | 15.88, 18.17 | 1.000   |
|                                                            | 16       | $n = 8$ | 16.69 | 15.48, 17.99 | $n = 10$ | 15.62  | 14.60, 16.70 | 0.549   |
|                                                            | 24       | $n = 8$ | 16.28 | 15.10, 17.55 | $n = 10$ | 16.23  | 15.17, 17.36 | 1.000   |
|                                                            | 32       | $n = 2$ | 16.41 | 14.36, 18.77 | $n = 10$ | 15.74  | 14.71, 16.83 | 0.997   |
|                                                            | 40       | $n = 8$ | 17.06 | 15.82, 18.40 | $n = 10$ | 16.33  | 15.27, 17.47 | 0.934   |
| Hematocrit (%)                                             | Baseline | $n = 8$ | 47.60 | 44.53, 50.89 | $n = 10$ | 44.07  | 41.52, 46.77 | 0.187   |
|                                                            | 8        | $n = 8$ | 47.77 | 44.69, 51.06 | $n = 10$ | 48.37* | 45.57, 51.34 | 1.000   |
|                                                            | 16       | $n = 8$ | 47.94 | 44.85, 51.25 | $n = 10$ | 46.65  | 43.95, 49.51 | 0.995   |
|                                                            | 24       | $n = 8$ | 47.34 | 44.28, 50.60 | $n = 10$ | 47.53* | 44.77, 50.45 | 1.000   |
|                                                            | 32       | $n = 2$ | 47.37 | 42.02, 53.40 | $n = 10$ | 46.13  | 43.46, 48.96 | 1.000   |
|                                                            | 40       | $n = 8$ | 49.19 | 46.01, 52.59 | $n = 10$ | 46.82  | 44.11, 49.70 | 0.766   |
| Mean corpuscular<br>volume (fL)                            | Baseline | $n = 8$ | 77.98 | 75.57, 80.40 | $n = 10$ | 77.87  | 75.70, 80.03 | 1.000   |
|                                                            | 8        | $n = 8$ | 78.48 | 76.06, 80.89 | $n = 10$ | 77.56  | 75.40, 79.72 | 0.998   |
|                                                            | 16       | $n = 8$ | 77.39 | 74.98, 79.81 | $n = 10$ | 77.31  | 75.14, 79.47 | 1.000   |
|                                                            | 24       | $n = 8$ | 77.66 | 75.24, 80.07 | $n = 10$ | 75.84* | 73.68, 78.00 | 0.805   |
|                                                            | 32       | $n = 2$ | 78.50 | 75.63, 81.37 | $n = 10$ | 76.84  | 74.68, 79.00 | 0.930   |
|                                                            | 40       | $n = 8$ | 77.56 | 75.14, 79.97 | $n = 10$ | 76.21* | 74.04, 78.37 | 0.963   |
| Mean corpuscular<br>haemoglobin (pg)                       | Baseline | $n = 8$ | 27.21 | 26.21, 28.20 | $n = 10$ | 27.69  | 26.80, 28.58 | 0.982   |
|                                                            | 8        | $n = 8$ | 27.66 | 26.66, 28.65 | $n = 10$ | 27.26  | 26.37, 28.15 | 0.996   |
|                                                            | 16       | $n = 8$ | 26.96 | 25.96, 27.95 | $n = 10$ | 25.91* | 25.02, 26.80 | 0.330** |
|                                                            | 24       | $n = 8$ | 26.70 | 25.70, 27.70 | $n = 10$ | 25.89* | 25.00, 26.78 | 0.678** |
|                                                            | 32       | $n = 2$ | 27.22 | 25.74, 28.70 | $n = 10$ | 26.22* | 25.33, 27.11 | 0.736   |
|                                                            | 40       | $n = 8$ | 26.90 | 25.90, 27.90 | $n = 10$ | 26.58* | 25.68, 27.47 | 0.999   |
| Mean corpuscular<br>haemoglobin<br>concentration<br>(g/dL) | Baseline | $n = 8$ | 34.89 | 34.19, 35.59 | $n = 10$ | 35.54  | 34.91, 36.17 | 0.475   |
|                                                            | 8        | $n = 8$ | 35.26 | 34.56, 35.96 | $n = 10$ | 35.14  | 34.51, 35.76 | 1.000   |
|                                                            | 16       | $n = 8$ | 34.81 | 34.11, 35.51 | $n = 10$ | 33.52* | 32.89, 34.14 | 0.001** |
|                                                            | 24       | $n = 8$ | 34.39 | 33.69, 35.09 | $n = 10$ | 34.15* | 33.52, 34.77 | 0.999   |
|                                                            | 32       | $n = 2$ | 34.41 | 33.03, 35.79 | $n = 10$ | 34.13* | 33.50, 34.75 | 1.000   |
|                                                            | 40       | $n = 8$ | 34.68 | 33.97, 35.39 | $n = 10$ | 34.87  | 34.24, 35.50 | 1.000   |
| Red blood cell<br>distribution width<br>(%)                | Baseline | $n = 8$ | 12.34 | 11.73, 12.95 | $n = 10$ | 12.02  | 11.47, 12.57 | 0.966   |
|                                                            | 8        | $n = 8$ | 11.94 | 11.33, 12.55 | $n = 10$ | 12.75* | 12.20, 13.29 | 0.088** |
|                                                            | 16       | $n = 8$ | 12.44 | 11.83, 13.05 | $n = 10$ | 12.77* | 12.22, 13.32 | 0.964   |
|                                                            | 24       | $n = 8$ | 12.56 | 11.95, 13.17 | $n = 10$ | 12.97* | 12.42, 13.52 | 0.854   |
|                                                            | 32       | $n = 2$ | 12.17 | 11.21, 13.12 | $n = 10$ | 12.68* | 12.13, 13.23 | 0.904   |
|                                                            | 40       | $n = 8$ | 12.47 | 11.86, 13.09 | $n = 10$ | 12.90* | 12.35, 13.45 | 0.834   |
| White blood cells<br>( $10^9/L$ )                          | Baseline | $n = 8$ | 6.41  | 4.94, 7.87   | $n = 10$ | 7.08   | 5.77, 8.39   | 0.988   |
|                                                            | 8        | $n = 8$ | 6.55  | 5.09, 8.01   | $n = 10$ | 6.37   | 5.07, 7.68   | 1.000   |
|                                                            | 16       | $n = 8$ | 6.10  | 4.64, 7.56   | $n = 10$ | 5.92*  | 4.62, 7.23   | 1.000   |
|                                                            | 24       | $n = 8$ | 5.98  | 4.52, 7.44   | $n = 10$ | 6.30   | 5.00, 7.61   | 1.000   |
|                                                            | 32       | $n = 2$ | 5.91  | 3.85, 7.96   | $n = 10$ | 6.22   | 4.92, 7.53   | 1.000   |
|                                                            | 40       | $n = 8$ | 5.59  | 4.13, 7.05   | $n = 10$ | 5.84*  | 4.54, 7.15   | 1.000   |
| Lymphocytes<br>( $10^9/L$ )                                | Baseline | $n = 8$ | 1.15  | 0.80, 1.66   | $n = 10$ | 1.17   | 0.84, 1.63   | 1.000   |
|                                                            | 8        | $n = 8$ | 1.22  | 0.84, 1.76   | $n = 10$ | 1.05   | 0.76, 1.45   | 0.995   |
|                                                            | 16       | $n = 8$ | 1.28  | 0.89, 1.85   | $n = 10$ | 1.14   | 0.82, 1.58   | 0.999   |

|                      |          |            |      |            |             |       |            |         |
|----------------------|----------|------------|------|------------|-------------|-------|------------|---------|
|                      | 24       | <i>n</i> 8 | 1.21 | 0.84, 1.75 | <i>n</i> 10 | 1.28  | 0.92, 1.77 | 1.000   |
|                      | 32       | <i>n</i> 2 | 1.35 | 0.81, 2.26 | <i>n</i> 10 | 1.24  | 0.89, 1.72 | 1.000   |
|                      | 40       | <i>n</i> 8 | 1.14 | 0.79, 1.64 | <i>n</i> 10 | 1.45  | 1.04, 2.01 | 0.878   |
| Monocytes            | Baseline | <i>n</i> 8 | 0.64 | 0.49, 0.82 | <i>n</i> 10 | 0.70  | 0.56, 0.87 | 0.998   |
| (10 <sup>9</sup> /L) | 8        | <i>n</i> 8 | 0.71 | 0.55, 0.92 | <i>n</i> 10 | 0.63  | 0.51, 0.79 | 0.986   |
|                      | 16       | <i>n</i> 8 | 0.65 | 0.50, 0.83 | <i>n</i> 10 | 0.58* | 0.46, 0.72 | 0.991   |
|                      | 24       | <i>n</i> 8 | 0.66 | 0.51, 0.85 | <i>n</i> 10 | 0.60  | 0.48, 0.75 | 0.996   |
|                      | 32       | <i>n</i> 2 | 0.64 | 0.45, 0.92 | <i>n</i> 10 | 0.60  | 0.48, 0.75 | 1.000   |
|                      | 40       | <i>n</i> 8 | 0.58 | 0.45, 0.74 | <i>n</i> 10 | 0.57* | 0.46, 0.71 | 1.000   |
| Granulocytes         | Baseline | <i>n</i> 8 | 4.35 | 3.33, 5.69 | <i>n</i> 10 | 4.76  | 3.74, 6.04 | 0.999   |
| (10 <sup>9</sup> /L) | 8        | <i>n</i> 8 | 4.36 | 3.34, 5.70 | <i>n</i> 10 | 4.48  | 3.52, 5.69 | 1.000   |
|                      | 16       | <i>n</i> 8 | 4.02 | 3.08, 5.26 | <i>n</i> 10 | 3.89  | 3.06, 4.95 | 1.000   |
|                      | 24       | <i>n</i> 8 | 3.96 | 3.03, 5.18 | <i>n</i> 10 | 4.31  | 3.39, 5.48 | 1.000   |
|                      | 32       | <i>n</i> 2 | 3.75 | 2.53, 5.56 | <i>n</i> 10 | 4.21  | 3.31, 5.35 | 0.999   |
|                      | 40       | <i>n</i> 8 | 3.69 | 2.82, 4.82 | <i>n</i> 10 | 3.63* | 2.86, 4.61 | 1.000   |
| Platelet count       | Baseline | <i>n</i> 8 | 238  | 150, 327   | <i>n</i> 10 | 208   | 129, 287   | 0.999   |
| (10 <sup>9</sup> /L) | 8        | <i>n</i> 8 | 191  | 102, 279   | <i>n</i> 10 | 264   | 185, 343   | 0.660** |
|                      | 16       | <i>n</i> 8 | 251  | 162, 339   | <i>n</i> 10 | 234   | 155, 313   | 1.000   |
|                      | 24       | <i>n</i> 8 | 198  | 109, 286   | <i>n</i> 10 | 262   | 183, 341   | 0.801   |
|                      | 32       | <i>n</i> 2 | 240  | 112, 367   | <i>n</i> 10 | 268   | 188, 347   | 1.000   |
|                      | 40       | <i>n</i> 8 | 203  | 114, 291   | <i>n</i> 10 | 279*  | 200, 358   | 0.606** |

\* A significant difference from baseline within diet group ( $p < 0.05$ )

\*\* A significant difference from baseline between diet groups ( $p < 0.05$ )
